# Supplementary material
Source: Research Square preprint supplement (doi:10.21203/rs.3.rs-9788821/v1)
Supplement: Supplementary file 1 [file f5a6ec990dca5d88333555b4.docx]

**Experimental Setup and Performance Analysis**

**1 Experimental Parameters and Dataset**

Experiments used Adam optimizer, Dice-cross-entropy loss, initial learning rate 0.01 (polynomial decay), 2000 epochs. Training set: 871 3D CT samples (356 NC, 515 VP); test set: 164 samples (60 NC, 104 VP), slice thickness 0.5-3 mm.

**2 Quantitative Result Analysis**

Test results (Table 1) show excellent performance: Dice ≈0.89 for both phases, NC phase recall 0.9806 and precision 0.9917. The algorithm performs well on both enhanced and routine non-contrast CT, providing a reliable clinical tool.

**Table 6 Segmentation performance on the test set**

| Phase | Dice | Hit-recall | Hit-precision | Fn/case | Fp/case |
| --- | --- | --- | --- | --- | --- |
| PVP | 0.8809 | 0.9567 | 0.9712 | 0.0865 | 0.0577 |
| NC | 0.8904 | 0.9806 | 0.9917 | 0.0500 | 0.0167 |

**Figure 6** The decision curve analysis for five LR models in training group (a), validation (b), and external testing group (c).
